# Supplementary figures and images for: Transient coarsening and the motility of optically heated Janus colloids in a binary liquid mixture
Source: Royal Society of Chemistry journal article supplement (doi:10.1039/d0sm00964d), 2020-01-01

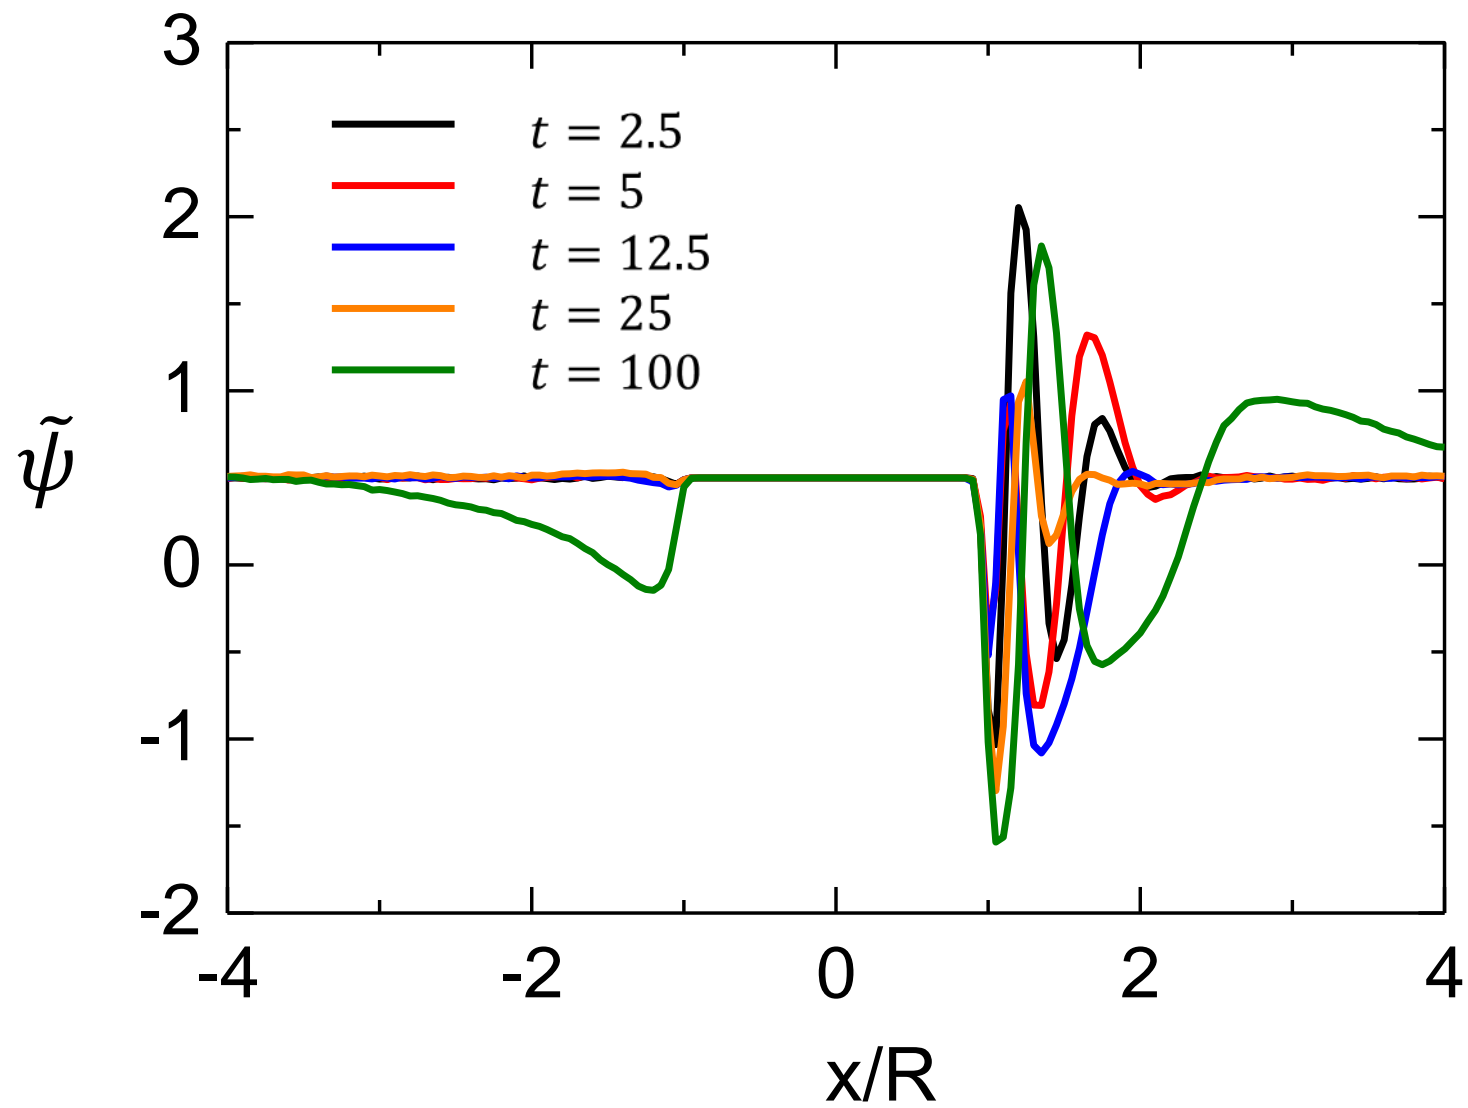

Supplement: d0sm00964d3.pdf [file d0sm00964d3.pdf]

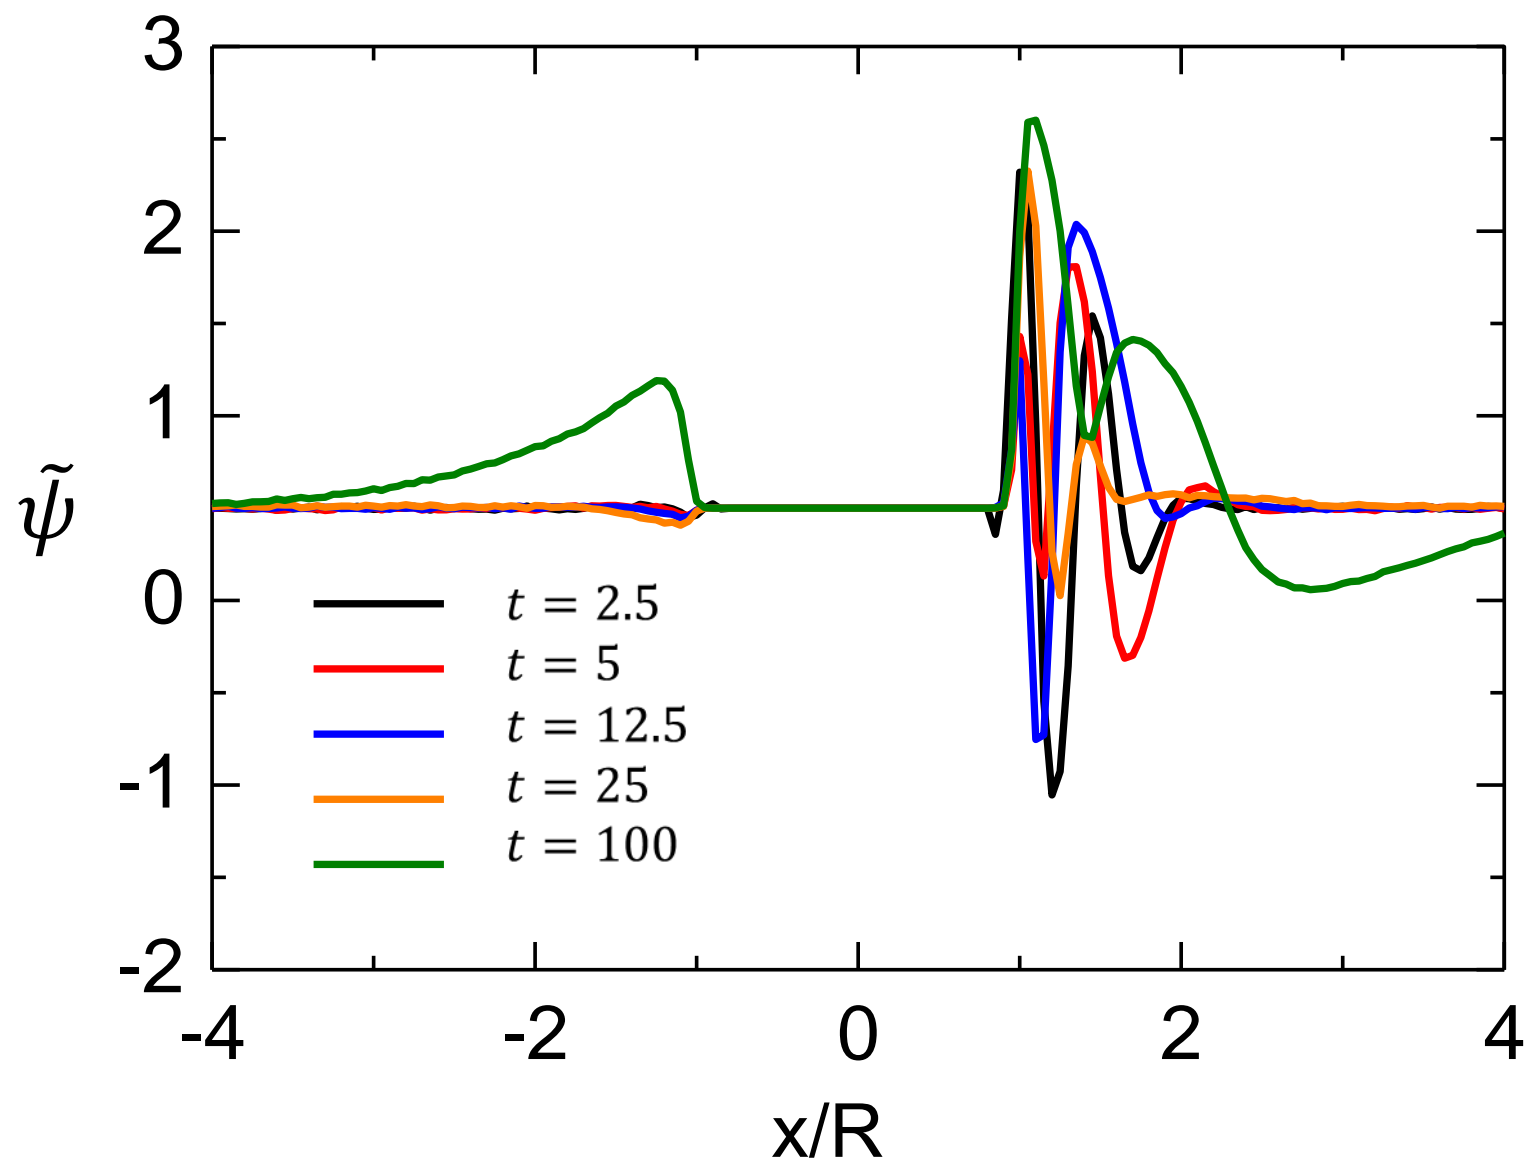

Supplement: d0sm00964d4.pdf [file d0sm00964d4.pdf]
